# Supplementary material for: Circulating adipokine concentrations and risk of five obesity‐related cancers: A Mendelian randomization study
Source: PubMed Central journal article supplement (PMC7894468; doi:10.1002/ijc.33338), 2020-10-26
Supplement: IJC-148-1625-s001.pdf [file IJC-148-1625-s001.pdf]

## **Circulating adipokine concentrations and risk of five obesity-related cancers: a Mendelian randomization study**

Niki L Dimou<sup>1</sup>, Nikos Papadimitriou<sup>1</sup>, Daniela Mariosa<sup>2</sup>, Mattias Johansson<sup>2</sup>, Paul Brennan<sup>2</sup>, Ulrike Peters<sup>3</sup>, Stephen J Chanock<sup>4</sup>, Mark Purdue<sup>4</sup>, D Timothy Bishop<sup>5</sup>, Manuela Gago-Dominquez<sup>6, 7</sup>, Graham G Giles<sup>8, 9, 10</sup>, Victor Moreno<sup>11, 12, 13, 14</sup>, Elizabeth A Platz<sup>15</sup>, Catherine M Tangen<sup>16</sup>, Alicja Wolk<sup>17, 18</sup>, Wei Zheng<sup>19</sup>, Xifeng Wu<sup>20, 21</sup>, Peter T Campbell<sup>22</sup>, Edward Giovannucci<sup>23, 24, 25</sup>, Yi Lin<sup>26</sup>, CCFR, Endometrial Cancer Association Consortium, Marc J Gunter<sup>1</sup>, Neil Murphy<sup>1</sup>

### **Table of contents**

#### **Supplementary Tables**

|                              |                 |
|------------------------------|-----------------|
| <b>Supplementary Table 1</b> | <b>p. 2-3</b>   |
| <b>Supplementary Table 2</b> | <b>p. 4-7</b>   |
| <b>Supplementary Table 3</b> | <b>p. 8-9</b>   |
| <b>Supplementary Table 4</b> | <b>p. 10-11</b> |
| <b>Supplementary Table 5</b> | <b>p. 12-14</b> |
| <b>Supplementary Table 6</b> | <b>p. 15-18</b> |
| <b>Supplementary Table 7</b> | <b>p. 19-25</b> |

**Supplementary Table 1. Characteristics of genetic variants associated with adipokines in published GWAS.**

| Adipokine       | Study (Pubmed ID)                    | SNPs        | Effect allele | Beta   | SE    | P-value   | R <sup>2</sup> |
|-----------------|--------------------------------------|-------------|---------------|--------|-------|-----------|----------------|
| adiponectin     | Spracklen, C.N., et al. (31178129)   | rs2791552   | C             | -0.054 | 0.007 | 1.75E-14  | 3.0%           |
| adiponectin     | Spracklen, C.N., et al. (31178129)   | rs2943641   | C             | -0.060 | 0.006 | 1.76E-21  |                |
| adiponectin     | Spracklen, C.N., et al. (31178129)   | rs2276853   | A             | -0.033 | 0.006 | 3.35E-08  |                |
| adiponectin     | Spracklen, C.N., et al. (31178129)   | rs3087866   | C             | -0.040 | 0.007 | 2.14E-08  |                |
| adiponectin     | Spracklen, C.N., et al. (31178129)   | rs13303     | C             | 0.060  | 0.006 | 2.69E-21  |                |
| adiponectin     | Spracklen, C.N., et al. (31178129)   | rs17366568  | A             | -0.228 | 0.009 | 1.43E-145 |                |
| adiponectin     | Spracklen, C.N., et al. (31178129)   | rs13133548  | A             | -0.039 | 0.006 | 5.91E-12  |                |
| adiponectin     | Spracklen, C.N., et al. (31178129)   | rs2925979   | C             | 0.082  | 0.006 | 1.38E-37  |                |
| adiponectin     | Spracklen, C.N., et al. (31178129)   | rs10282707  | T             | -0.040 | 0.006 | 1.96E-10  |                |
| adiponectin     | Spracklen, C.N., et al. (31178129)   | rs3735080   | T             | -0.049 | 0.007 | 7.70E-13  |                |
| adiponectin     | Spracklen, C.N., et al. (31178129)   | rs7134375   | A             | 0.054  | 0.006 | 3.69E-20  |                |
| adiponectin     | Spracklen, C.N., et al. (31178129)   | rs10861661  | C             | -0.040 | 0.007 | 1.75E-09  |                |
| adiponectin     | Spracklen, C.N., et al. (31178129)   | rs11057405  | A             | -0.080 | 0.011 | 2.90E-14  |                |
| adiponectin     | Spracklen, C.N., et al. (31178129)   | rs11057353  | C             | 0.054  | 0.006 | 2.74E-19  |                |
| adiponectin     | Spracklen, C.N., et al. (31178129)   | rs4311394   | G             | -0.045 | 0.007 | 1.68E-10  |                |
| adiponectin     | Spracklen, C.N., et al. (31178129)   | rs3865188   | T             | -0.035 | 0.006 | 1.14E-08  |                |
| adiponectin     | Spracklen, C.N., et al. (31178129)   | rs145119400 | A             | -0.300 | 0.042 | 8.95E-13  |                |
| adiponectin     | Spracklen, C.N., et al. (31178129)   | rs4805885   | C             | 0.058  | 0.006 | 2.85E-25  |                |
| leptin          | Kilpelainen, T.O., et al. (26833098) | rs10487505  | G             | 0.029  | 0.004 | 1.99E-12  |                |
| leptin          | Kilpelainen, T.O., et al. (26833098) | rs6071166   | C             | 0.024  | 0.004 | 1.75E-08  |                |
| leptin receptor | Suhre, K., et al. (28240269)         | rs17415296  | C             | 1.400  | 0.033 | 4.47E-229 | 5.0%           |
| leptin receptor | Suhre, K., et al. (28240269)         | rs4655537   | A             | 0.350  | 0.044 | 7.42E-15  |                |
| leptin receptor | Suhre, K., et al. (28240269)         | rs17412403  | T             | 0.328  | 0.043 | 8.66E-14  |                |
| leptin receptor | Suhre, K., et al. (28240269)         | rs7535099   | G             | 0.346  | 0.051 | 3.06E-11  |                |

|                                      |                              |            |   |       |        |          |      |
|--------------------------------------|------------------------------|------------|---|-------|--------|----------|------|
| plasminogen<br>activator inhibitor-1 | Huang, J., et al. (22990020) | rs11128603 | A | 0.066 | 0.012  | 9.4E-08  |      |
| plasminogen<br>activator inhibitor-1 | Huang, J., et al. (22990020) | rs2227631  | A | 0.073 | 0.007  | 3.20E-24 | 0.7% |
| plasminogen<br>activator inhibitor-1 | Huang, J., et al. (22990020) | rs6976053  | T | 0.048 | 0.007  | 5.80E-13 |      |
| plasminogen<br>activator inhibitor-1 | Huang, J., et al. (22990020) | rs6486122  | T | 0.046 | 0.0072 | 1.7E-10  |      |

GWAS, genome-wide association studies; SNPs, single nucleotide polymorphisms

**Supplementary Table 2. Mendelian randomization estimates between adiponectin concentration and cancer risk.**

| Cancer type            | Methods                                    | Estimates (OR) | 95% CI      | P-value | P-value for pleiotropy or heterogeneity |
|------------------------|--------------------------------------------|----------------|-------------|---------|-----------------------------------------|
| <b>Colorectal</b>      |                                            |                |             |         |                                         |
| <b>Overall</b>         | Inverse-variance weighted                  | 0.90           | (0.84-0.97) | 0.01    | 0.01                                    |
|                        | Inverse-variance weighted (random effects) | 0.90           | (0.82-1.00) | 0.04    | 0.01                                    |
|                        | Wald (rs17366568)                          | 0.92           | (0.82-1.03) | 0.16    | NA                                      |
|                        | MR-Egger                                   | 0.98           | (0.79-1.21) | 0.82    | 0.37                                    |
|                        | Weighted median                            | 0.92           | (0.83-1.02) | 0.11    | NA                                      |
| <b>Overall (men)</b>   | Inverse-variance weighted                  | 0.89           | (0.80-0.99) | 0.04    | 0.02                                    |
|                        | Inverse-variance weighted (random effects) | 0.89           | (0.79-1.04) | 0.16    | 0.02                                    |
|                        | Wald (rs17366568)                          | 0.96           | (0.82-1.12) | 0.57    | NA                                      |
|                        | MR-Egger                                   | 1.01           | (0.70-1.45) | 0.96    | 0.39                                    |
|                        | Weighted median                            | 0.95           | (0.83-1.10) | 0.51    | NA                                      |
| <b>Overall (women)</b> | Inverse-variance weighted                  | 0.90           | (0.81-1.01) | 0.07    | 0.63                                    |
|                        | Wald (rs17366568)                          | 0.88           | (0.74-1.06) | 0.17    | NA                                      |
|                        | MR-Egger                                   | 0.80           | (0.62-1.03) | 0.08    | 0.29                                    |
|                        | Weighted median                            | 0.88           | (0.76-1.02) | 0.10    | NA                                      |
| <b>Colon</b>           | Inverse-variance weighted                  | 0.90           | (0.83-0.98) | 0.02    | 0.09                                    |
|                        | Wald (rs17366568)                          | 0.94           | (0.82-1.09) | 0.41    | NA                                      |
|                        | MR-Egger                                   | 0.97           | (0.78-1.22) | 0.81    | 0.41                                    |
|                        | Weighted median                            | 0.93           | (0.83-1.06) | 0.28    | NA                                      |
| <b>Rectal</b>          | Inverse-variance weighted                  | 0.91           | (0.82-1.02) | 0.11    | 0.06                                    |

|                             |                                            |      |             |      |      |
|-----------------------------|--------------------------------------------|------|-------------|------|------|
|                             | Wald (rs17366568)                          | 0.96 | (0.80-1.16) | 0.70 | NA   |
|                             | MR-Egger                                   | 1.11 | (0.83-1.47) | 0.47 | 0.12 |
|                             | Weighted median                            | 0.97 | (0.83-1.13) | 0.67 | NA   |
| <b>Pancreatic</b>           |                                            |      |             |      |      |
| <b>Overall</b>              | Inverse-variance weighted                  | 1.10 | (0.91-1.34) | 0.32 | 0.01 |
|                             | Inverse-variance weighted (random effects) | 1.10 | (0.84-1.45) | 0.48 | 0.01 |
|                             | Wald (rs17366568)                          | 1.00 | (0.73-1.38) | 0.99 | NA   |
|                             | MR-Egger                                   | 1.02 | (0.56-1.87) | 0.95 | 0.75 |
|                             | Weighted median                            | 1.02 | (0.77-1.34) | 0.91 | NA   |
| <b>Overall (men)</b>        | Inverse-variance weighted                  | 1.08 | (0.82-1.43) | 0.57 | 0.32 |
|                             | Wald (rs17366568)                          | 1.15 | (0.76-1.73) | 0.52 | NA   |
|                             | MR-Egger                                   | 1.33 | (0.67-2.65) | 0.38 | 0.46 |
|                             | Weighted median                            | 1.12 | (0.78-1.62) | 0.54 | NA   |
| <b>Overall (women)</b>      | Inverse-variance weighted                  | 1.08 | (0.79-1.48) | 0.61 | 0.03 |
|                             | Inverse-variance weighted (random effects) | 1.08 | (0.69-1.70) | 0.73 | 0.03 |
|                             | Wald (rs17366568)                          | 0.83 | (0.50-1.39) | 0.49 | NA   |
|                             | MR-Egger                                   | 1.01 | (0.28-3.63) | 0.99 | 0.88 |
|                             | Weighted median                            | 0.92 | (0.59-1.42) | 0.70 | NA   |
| <b>Renal cell carcinoma</b> |                                            |      |             |      |      |
| <b>Overall</b>              | Inverse-variance weighted                  | 0.93 | (0.79-1.08) | 0.33 | 0.37 |
|                             | Wald (rs17366568)                          | 0.98 | (0.75-1.30) | 0.90 | NA   |
|                             | MR-Egger                                   | 0.91 | (0.64-1.29) | 0.60 | 0.91 |
|                             | Weighted median                            | 0.95 | (0.76-1.18) | 0.64 | NA   |
| <b>Overall (men)</b>        | Inverse-variance weighted                  | 0.95 | (0.69-1.30) | 0.73 | 0.21 |
|                             | Wald (rs17366568)                          | 0.65 | (0.39-1.07) | 0.09 | NA   |
|                             | MR-Egger                                   | 0.55 | (0.28-1.11) | 0.13 | 0.12 |

|                        |                                            |      |             |      |      |
|------------------------|--------------------------------------------|------|-------------|------|------|
|                        | Weighted median                            | 0.77 | (0.51-1.15) | 0.20 | NA   |
| <b>Overall (women)</b> | Inverse-variance weighted                  | 0.83 | (0.56-1.23) | 0.36 | 0.84 |
|                        | Wald (rs17366568)                          | 1.18 | (0.61-2.31) | 0.62 | NA   |
|                        | MR-Egger                                   | 1.49 | (0.59-3.75) | 0.42 | 0.21 |
|                        | Weighted median                            | 1.00 | (0.60-1.67) | 0.99 | NA   |
| <b>Ovarian</b>         |                                            |      |             |      |      |
| <b>Overall</b>         | Inverse-variance weighted                  | 1.07 | (0.96-1.19) | 0.22 | 0.53 |
|                        | Wald (rs17366568)                          | 1.03 | (0.89-1.19) | 0.69 | NA   |
|                        | MR-Egger                                   | 0.95 | (0.75-1.19) | 0.62 | 0.21 |
|                        | Weighted median                            | 1.03 | (0.91-1.17) | 0.63 | NA   |
| <b>Serous</b>          | Inverse-variance weighted                  | 1.07 | (0.95-1.21) | 0.25 | 0.94 |
|                        | Wald (rs17366568)                          | 1.07 | (0.91-1.26) | 0.44 | NA   |
|                        | MR-Egger                                   | 1.03 | (0.81-1.32) | 0.79 | 0.73 |
|                        | Weighted median                            | 1.07 | (0.92-1.23) | 0.38 | NA   |
| <b>Clear-cell</b>      | Inverse-variance weighted                  | 1.30 | (0.94-1.78) | 0.11 | 0.60 |
|                        | Wald (rs17366568)                          | 1.42 | (0.93-2.16) | 0.11 | NA   |
|                        | MR-Egger                                   | 1.56 | (0.75-3.27) | 0.19 | 0.51 |
|                        | Weighted median                            | 1.41 | (0.97-2.05) | 0.07 | NA   |
| <b>Endometrioid</b>    | Inverse-variance weighted                  | 1.05 | (0.84-1.32) | 0.66 | 0.28 |
|                        | Wald (rs17366568)                          | 0.91 | (0.67-1.24) | 0.56 | NA   |
|                        | MR-Egger                                   | 0.73 | (0.42-1.26) | 0.21 | 0.11 |
|                        | Weighted median                            | 0.91 | (0.69-1.21) | 0.53 | NA   |
| <b>Endometrial</b>     |                                            |      |             |      |      |
| <b>Overall</b>         | Inverse-variance weighted                  | 1.02 | (0.89-1.17) | 0.75 | 0.02 |
|                        | Inverse-variance weighted (random effects) | 1.02 | (0.83-1.26) | 0.84 | 0.02 |

|                   |      |             |      |      |
|-------------------|------|-------------|------|------|
| Wald (rs17366568) | 1.01 | (0.80-1.26) | 0.97 | NA   |
| MR-Egger          | 1.02 | (0.55-1.86) | 0.95 | 0.98 |
| Weighted median   | 1.01 | (0.84-1.21) | 0.94 | NA   |

---

OR: odds ratio; CI: confidence intervals; P-value for pleiotropy in MR-Egger regression; P-value for heterogeneity in inverse-variance weighted analysis.

**Supplementary Table 3. Mendelian randomization estimates between adiponectin concentration and colorectal cancer risk using summary estimates of adiponectin unadjusted for body mass index.**

| Cancer type            | Methods                               | Estimates (OR) | 95% CI      | P-value | P-value for pleiotropy or heterogeneity |
|------------------------|---------------------------------------|----------------|-------------|---------|-----------------------------------------|
| <b>Colorectal</b>      |                                       |                |             |         |                                         |
| <b>Overall</b>         | Inverse-variance weighted             | 0.90           | (0.84-0.97) | 0.01    | 0.01                                    |
|                        | MR-Egger                              | 0.98           | (0.79-1.21) | 0.84    | 0.33                                    |
|                        | Weighted median                       | 0.92           | (0.83-1.02) | 0.12    | NA                                      |
|                        | Multivariable analysis (BMI adjusted) | 0.92           | (0.84-1.01) | 0.10    | 0.01                                    |
| <b>Overall (men)</b>   | Inverse-variance weighted             | 0.89           | (0.80-0.99) | 0.04    | 0.02                                    |
|                        | MR-Egger                              | 1.00           | (0.69-1.45) | 0.99    | 0.41                                    |
|                        | Weighted median                       | 0.95           | (0.82-1.10) | 0.50    | NA                                      |
|                        | Multivariable analysis (BMI adjusted) | 0.98           | (0.86-1.13) | 0.80    | 0.10                                    |
| <b>Overall (women)</b> | Inverse-variance weighted             | 0.90           | (0.81-1.01) | 0.07    | 0.62                                    |
|                        | MR-Egger                              | 0.82           | (0.64-1.05) | 0.11    | 0.38                                    |
|                        | Weighted median                       | 0.89           | (0.77-1.03) | 0.10    | NA                                      |
|                        | Multivariable analysis (BMI adjusted) | 0.88           | (0.77-1.02) | 0.08    | 0.54                                    |
| <b>Colon</b>           | Inverse-variance weighted             | 0.90           | (0.82-0.98) | 0.02    | 0.08                                    |
|                        | MR-Egger                              | 0.98           | (0.78-1.23) | 0.84    | 0.36                                    |
|                        | Weighted median                       | 0.93           | (0.82-1.06) | 0.29    | NA                                      |
|                        | Multivariable analysis (BMI adjusted) | 0.92           | (0.82-1.03) | 0.16    | 0.09                                    |
| <b>Rectal</b>          | Inverse-variance weighted             | 0.91           | (0.81-1.03) | 0.13    | 0.05                                    |



|                                       |      |             |      |      |
|---------------------------------------|------|-------------|------|------|
| MR-Egger                              | 1.11 | (0.83-1.47) | 0.46 | 0.11 |
| Weighted median                       | 0.97 | (0.82-1.14) | 0.68 | NA   |
| Multivariable analysis (BMI adjusted) | 0.94 | (0.81-1.09) | 0.40 | 0.04 |

---

OR: odds ratio; CI: confidence intervals; P-value for pleiotropy in MR-Egger regression; P-value for heterogeneity in inverse-variance weighted analysis; BMI: Body mass index.

**Supplementary Table 4. Mendelian randomization estimates between leptin concentration and cancer risk.**

| <b>Cancer type</b>                | <b>Estimates (OR)<sup>a</sup></b> | <b>95% CI</b> | <b>P-value</b> | <b>P-value for pleiotropy or heterogeneity</b> |
|-----------------------------------|-----------------------------------|---------------|----------------|------------------------------------------------|
| <b>Colorectal</b>                 |                                   |               |                |                                                |
| <b>Overall</b>                    | 0.99                              | (0.62-1.57)   | 0.96           | 0.32                                           |
| <b>Overall (rs10487505)</b>       | 0.82                              | (0.45-1.48)   | 0.51           | NA                                             |
| <b>Overall (men)</b>              | 1.66                              | (0.77-3.57)   | 0.20           | 0.31                                           |
| <b>Overall (men-rs10487505)</b>   | 1.19                              | (0.43-3.24)   | 0.74           | NA                                             |
| <b>Overall (women)</b>            | 0.69                              | (0.38-1.27)   | 0.24           | 0.72                                           |
| <b>Overall (women-rs10487505)</b> | 0.64                              | (0.30-1.35)   | 0.24           | NA                                             |
| <b>Colon</b>                      | 0.82                              | (0.47-1.43)   | 0.48           | 0.26                                           |
| <b>Colon (rs10487505)</b>         | 0.63                              | (0.31-1.30)   | 0.21           | NA                                             |
| <b>Rectal</b>                     | 1.66                              | (0.80-3.44)   | 0.18           | 0.72                                           |
| <b>Rectal (rs10487505)</b>        | 1.49                              | (0.59-3.79)   | 0.40           | NA                                             |
| <b>Pancreatic</b>                 |                                   |               |                |                                                |
| <b>Overall</b>                    | 0.39                              | (0.11-1.37)   | 0.14           | 0.32                                           |
| <b>Overall (rs10487505)</b>       | 0.24                              | (0.05-1.17)   | 0.08           | NA                                             |
| <b>Overall (men)</b>              | 0.43                              | (0.06-3.18)   | 0.41           | 0.18                                           |
| <b>Overall (men-rs10487505)</b>   | 0.14                              | (0.01-1.87)   | 0.14           | NA                                             |
| <b>Overall (women)</b>            | 0.35                              | (0.06-1.93)   | 0.23           | 0.98                                           |
| <b>Overall (women-rs10487505)</b> | 0.35                              | (0.04-2.94)   | 0.34           | NA                                             |
| <b>Renal cell carcinoma</b>       |                                   |               |                |                                                |
| <b>Overall</b>                    | 0.93                              | (0.35-2.44)   | 0.88           | 0.84                                           |
| <b>Overall (rs10487505)</b>       | 1.00                              | (0.29-3.43)   | 0.99           | NA                                             |

|                                   |      |              |      |      |
|-----------------------------------|------|--------------|------|------|
| <b>Overall (men)</b>              | 0.55 | (0.09-3.53)  | 0.53 | 0.95 |
| <b>Overall (men-rs10487505)</b>   | 0.58 | (0.05-6.13)  | 0.65 | NA   |
| <b>Overall (women)</b>            | 2.61 | (0.25-27.69) | 0.43 | 0.15 |
| <b>Overall (women-rs10487505)</b> | 0.70 | (0.04-13.77) | 0.81 | NA   |
| <b>Ovarian</b>                    |      |              |      |      |
| <b>Overall</b>                    | 1.78 | (0.93-3.38)  | 0.08 | 0.99 |
| <b>Overall (rs10487505)</b>       | 1.78 | (0.81-3.91)  | 0.15 | NA   |
| <b>Serous</b>                     | 1.80 | (0.86-3.78)  | 0.12 | 0.98 |
| <b>Serous (rs10487505)</b>        | 1.79 | (0.72-4.44)  | 0.21 | NA   |
| <b>Clear-cell</b>                 | 6.27 | (0.90-43.67) | 0.06 | 0.60 |
| <b>Clear-cell (rs10487505)</b>    | 4.33 | (0.40-46.87) | 0.23 | NA   |
| <b>Endometrioid</b>               | 1.13 | (0.28-4.54)  | 0.87 | 0.42 |
| <b>Endometrioid (rs10487505)</b>  | 1.69 | (0.31-9.28)  | 0.55 | NA   |
| <b>Endometrial</b>                |      |              |      |      |
| <b>Overall</b>                    | 1.46 | (0.69-3.06)  | 0.32 | 0.80 |
| <b>Overall (rs10487505)</b>       | 1.36 | (0.55-3.39)  | 0.50 | NA   |

<sup>a</sup> Effect estimates calculated with the Inverse-variance weighted method. The MR-Egger and Weighted median method cannot be applied for leptin due to the low number of variants (i.e. two variants).

OR: odds ratio; CI: confidence intervals; P-value for pleiotropy in MR-Egger regression; P-value for heterogeneity in inverse-variance weighted analysis.

**Supplementary Table 5. Mendelian randomization estimates between soluble leptin receptor concentration and cancer risk.**

| Cancer type            | Methods                   | Estimates (OR) | 95% CI      | P-value | P-value for pleiotropy or heterogeneity |
|------------------------|---------------------------|----------------|-------------|---------|-----------------------------------------|
| <b>Colorectal</b>      |                           |                |             |         |                                         |
| <b>Overall</b>         | Inverse-variance weighted | 0.99           | (0.98-1.00) | 0.20    | 0.68                                    |
|                        | MR-Egger                  | 0.99           | (0.95-1.04) | 0.57    | 0.79                                    |
|                        | Weighted median           | 0.99           | (0.98-1.01) | 0.22    | NA                                      |
| <b>Overall (men)</b>   | Inverse-variance weighted | 1.00           | (0.98-1.02) | 0.93    | 0.75                                    |
|                        | MR-Egger                  | 1.01           | (0.96-1.06) | 0.72    | 0.61                                    |
|                        | Weighted median           | 1.00           | (0.98-1.02) | 0.92    | NA                                      |
| <b>Overall (women)</b> | Inverse-variance weighted | 0.98           | (0.96-1.00) | 0.06    | 0.78                                    |
|                        | MR-Egger                  | 0.98           | (0.93-1.03) | 0.23    | 0.90                                    |
|                        | Weighted median           | 0.98           | (0.96-1.00) | 0.07    | NA                                      |
| <b>Colon</b>           | Inverse-variance weighted | 0.99           | (0.98-1.01) | 0.35    | 0.93                                    |
|                        | MR-Egger                  | 1.00           | (0.97-1.02) | 0.76    | 0.75                                    |
|                        | Weighted median           | 0.99           | (0.98-1.01) | 0.47    | NA                                      |
| <b>Rectal</b>          | Inverse-variance weighted | 0.98           | (0.96-1.00) | 0.07    | 0.26                                    |
|                        | MR-Egger                  | 0.98           | (0.88-1.10) | 0.57    | 0.91                                    |
|                        | Weighted median           | 0.98           | (0.96-1.00) | 0.09    | NA                                      |
| <b>Pancreatic</b>      |                           |                |             |         |                                         |
| <b>Overall</b>         | Inverse-variance weighted | 1.03           | (0.99-1.07) | 0.12    | 0.10                                    |
|                        | MR-Egger                  | 1.01           | (0.80-1.29) | 0.82    | 0.75                                    |
|                        | Weighted median           | 1.02           | (0.98-1.07) | 0.26    | NA                                      |
| <b>Overall (men)</b>   | Inverse-variance weighted | 1.06           | (1.01-1.12) | 0.02    | 0.08                                    |

|                             |                           |      |             |      |      |
|-----------------------------|---------------------------|------|-------------|------|------|
|                             | MR-Egger                  | 1.03 | (0.75-1.41) | 0.73 | 0.63 |
|                             | Weighted median           | 1.05 | (1.00-1.11) | 0.07 | NA   |
| <b>Overall (women)</b>      | Inverse-variance weighted | 0.99 | (0.94-1.05) | 0.77 | 0.16 |
|                             | MR-Egger                  | 1.00 | (0.71-1.39) | 0.98 | 0.93 |
|                             | Weighted median           | 1.00 | (0.94-1.06) | 0.96 | NA   |
| <b>Renal cell carcinoma</b> |                           |      |             |      |      |
| <b>Overall</b>              | Inverse-variance weighted | 1.02 | (0.99-1.06) | 0.12 | 0.96 |
|                             | MR-Egger                  | 1.02 | (0.92-1.14) | 0.44 | 0.99 |
|                             | Weighted median           | 1.02 | (0.99-1.06) | 0.12 | NA   |
| <b>Overall (men)</b>        | Inverse-variance weighted | 1.02 | (0.96-1.08) | 0.60 | 0.50 |
|                             | MR-Egger                  | 1.02 | (0.83-1.25) | 0.75 | 0.97 |
|                             | Weighted median           | 1.02 | (0.96-1.08) | 0.61 | NA   |
| <b>Overall (women)</b>      | Inverse-variance weighted | 1.04 | (0.97-1.12) | 0.29 | 0.07 |
|                             | MR-Egger                  | 1.05 | (0.80-1.36) | 0.54 | 0.91 |
|                             | Weighted median           | 1.05 | (0.97-1.14) | 0.21 | NA   |
| <b>Ovarian</b>              |                           |      |             |      |      |
| <b>Overall</b>              | Inverse-variance weighted | 1.01 | (0.99-1.03) | 0.35 | 0.84 |
|                             | MR-Egger                  | 1.01 | (0.96-1.06) | 0.68 | 0.84 |
|                             | Weighted median           | 1.01 | (0.99-1.03) | 0.40 | NA   |
| <b>Serous</b>               | Inverse-variance weighted | 1.02 | (1.00-1.05) | 0.10 | 0.89 |
|                             | MR-Egger                  | 1.02 | (0.97-1.06) | 0.48 | 0.72 |
|                             | Weighted median           | 1.02 | (0.99-1.05) | 0.16 | NA   |
| <b>Clear-cell</b>           | Inverse-variance weighted | 0.99 | (0.93-1.06) | 0.86 | 0.09 |
|                             | MR-Egger                  | 0.96 | (0.64-1.45) | 0.72 | 0.70 |
|                             | Weighted median           | 0.98 | (0.92-1.05) | 0.62 | NA   |
| <b>Endometrioid</b>         | Inverse-variance weighted | 0.98 | (0.94-1.03) | 0.52 | 0.65 |

|                    |                           |      |             |      |      |
|--------------------|---------------------------|------|-------------|------|------|
|                    | MR-Egger                  | 1.02 | (0.92-1.12) | 0.69 | 0.32 |
|                    | Weighted median           | 0.99 | (0.94-1.04) | 0.68 | NA   |
| <b>Endometrial</b> |                           |      |             |      |      |
| <b>Overall</b>     | Inverse-variance weighted | 1.02 | (1.00-1.05) | 0.09 | 0.38 |
|                    | MR-Egger                  | 1.01 | (0.92-1.10) | 0.83 | 0.44 |
|                    | Weighted median           | 1.02 | (0.99-1.04) | 0.22 | NA   |

---

OR: odds ratio; CI: confidence intervals; P-value for pleiotropy in MR-Egger regression; P-value for heterogeneity in inverse-variance weighted analysis.

**Supplementary Table 6. Mendelian randomization estimates between plasminogen activator inhibitor-1 concentration and cancer risk.**

| Cancer type            | Methods                   | Estimates (OR) | 95% CI      | P-value | P-value for pleiotropy or heterogeneity |
|------------------------|---------------------------|----------------|-------------|---------|-----------------------------------------|
| <b>Colorectal</b>      |                           |                |             |         |                                         |
| <b>Overall</b>         | Inverse-variance weighted | 1.01           | (0.86-1.19) | 0.92    | 0.89                                    |
|                        | Wald (rs2227631)          | 1.04           | (0.82-1.33) | 0.72    | NA                                      |
|                        | MR-Egger                  | 1.33           | (0.60-2.93) | 0.48    | 0.49                                    |
|                        | Weighted median           | 1.02           | (0.85-1.24) | 0.81    | NA                                      |
| <b>Overall (men)</b>   | Inverse-variance weighted | 0.94           | (0.75-1.19) | 0.62    | 0.97                                    |
|                        | Wald (rs2227631)          | 0.95           | (0.68-1.33) | 0.78    | NA                                      |
|                        | MR-Egger                  | 1.15           | (0.38-3.48) | 0.81    | 0.72                                    |
|                        | Weighted median           | 0.94           | (0.72-1.23) | 0.66    | NA                                      |
| <b>Overall (women)</b> | Inverse-variance weighted | 1.05           | (0.83-1.32) | 0.71    | 0.95                                    |
|                        | Wald (rs2227631)          | 1.11           | (0.79-1.56) | 0.56    | NA                                      |
|                        | MR-Egger                  | 1.45           | (0.46-4.52) | 0.52    | 0.57                                    |
|                        | Weighted median           | 1.08           | (0.82-1.42) | 0.57    | NA                                      |
| <b>Colon</b>           | Inverse-variance weighted | 0.90           | (0.74-1.10) | 0.30    | 0.80                                    |
|                        | Wald (rs2227631)          | 0.96           | (0.72-1.29) | 0.80    | NA                                      |
|                        | MR-Egger                  | 1.22           | (0.39-3.85) | 0.69    | 0.53                                    |
|                        | Weighted median           | 0.95           | (0.75-1.19) | 0.64    | NA                                      |
| <b>Rectal</b>          | Inverse-variance weighted | 1.18           | (0.91-1.52) | 0.21    | 0.96                                    |
|                        | Wald (rs2227631)          | 1.21           | (0.83-1.76) | 0.32    | NA                                      |
|                        | MR-Egger                  | 1.56           | (0.45-5.41) | 0.48    | 0.65                                    |
|                        | Weighted median           | 1.18           | (0.87-1.58) | 0.28    | NA                                      |

**Pancreatic**

|                        |                           |      |               |      |      |
|------------------------|---------------------------|------|---------------|------|------|
| <b>Overall</b>         | Inverse-variance weighted | 1.13 | (0.73-1.76)   | 0.58 | 0.70 |
|                        | Wald (rs2227631)          | 1.14 | (0.60-2.18)   | 0.68 | NA   |
|                        | MR-Egger                  | 2.28 | (0.08-63.81)  | 0.45 | 0.51 |
|                        | Weighted median           | 1.15 | (0.69-1.94)   | 0.59 | NA   |
| <b>Overall (men)</b>   | Inverse-variance weighted | 0.93 | (0.52-1.69)   | 0.82 | 0.35 |
|                        | Wald (rs2227631)          | 1.11 | (0.46-2.67)   | 0.81 | NA   |
|                        | MR-Egger                  | 7.55 | (0.06-983.95) | 0.22 | 0.20 |
|                        | Weighted median           | 0.90 | (0.44-1.86)   | 0.77 | NA   |
| <b>Overall (women)</b> | Inverse-variance weighted | 1.43 | (0.74-2.76)   | 0.29 | 0.51 |
|                        | Wald (rs2227631)          | 1.17 | (0.45-3.09)   | 0.75 | NA   |
|                        | MR-Egger                  | 0.55 | (0.00-558.04) | 0.74 | 0.60 |
|                        | Weighted median           | 1.20 | (0.54-2.64)   | 0.66 | NA   |

**Renal cell carcinoma**

|                        |                           |      |                 |      |      |
|------------------------|---------------------------|------|-----------------|------|------|
| <b>Overall</b>         | Inverse-variance weighted | 1.09 | (0.78-1.52)     | 0.62 | 0.13 |
|                        | Wald (rs2227631)          | 0.72 | (0.44-1.18)     | 0.20 | NA   |
|                        | MR-Egger                  | 0.26 | (0.01-9.04)     | 0.24 | 0.22 |
|                        | Weighted median           | 1.16 | (0.73-1.83)     | 0.54 | NA   |
| <b>Overall (men)</b>   | Inverse-variance weighted | 1.16 | (0.62-2.19)     | 0.64 | 0.25 |
|                        | Wald (rs2227631)          | 0.65 | (0.26-1.64)     | 0.36 | NA   |
|                        | MR-Egger                  | 0.08 | (0.00-69.67)    | 0.25 | 0.22 |
|                        | Weighted median           | 1.25 | (0.58-2.73)     | 0.58 | NA   |
| <b>Overall (women)</b> | Inverse-variance weighted | 0.79 | (0.36-1.77)     | 0.57 | 0.26 |
|                        | Wald (rs2227631)          | 0.63 | (0.20-2.05)     | 0.45 | NA   |
|                        | MR-Egger                  | 2.23 | (0.00-11240.93) | 0.72 | 0.65 |
|                        | Weighted median           | 0.80 | (0.31-2.11)     | 0.67 | NA   |



|                     |                           |      |               |      |      |
|---------------------|---------------------------|------|---------------|------|------|
| <b>Ovarian</b>      |                           |      |               |      |      |
| <b>Overall</b>      | Inverse-variance weighted | 1.22 | (0.95-1.55)   | 0.11 | 0.53 |
|                     | Wald (rs2227631)          | 1.36 | (0.95-1.94)   | 0.10 | NA   |
|                     | MR-Egger                  | 1.65 | (0.12-22.04)  | 0.50 | 0.66 |
|                     | Weighted median           | 1.26 | (0.94-1.70)   | 0.12 | NA   |
| <b>Serous</b>       | Inverse-variance weighted | 1.16 | (0.87-1.53)   | 0.31 | 0.26 |
|                     | Wald (rs2227631)          | 1.50 | (0.99-2.27)   | 0.05 | NA   |
|                     | MR-Egger                  | 2.20 | (0.05-98.65)  | 0.47 | 0.54 |
|                     | Weighted median           | 1.31 | (0.92-1.88)   | 0.14 | NA   |
| <b>Clear-cell</b>   | Inverse-variance weighted | 1.02 | (0.48-2.13)   | 0.97 | 0.15 |
|                     | Wald (rs2227631)          | 0.41 | (0.14-1.23)   | 0.11 | NA   |
|                     | MR-Egger                  | 0.02 | (0.00-6.32)   | 0.10 | 0.10 |
|                     | Weighted median           | 1.27 | (0.47-3.40)   | 0.64 | NA   |
| <b>Endometrioid</b> | Inverse-variance weighted | 1.94 | (1.14-3.31)   | 0.01 | 0.62 |
|                     | Wald (rs2227631)          | 1.63 | (0.75-3.56)   | 0.22 | NA   |
|                     | MR-Egger                  | 2.18 | (0.01-461.82) | 0.60 | 0.93 |
|                     | Weighted median           | 1.86 | (0.98-3.52)   | 0.06 | NA   |
| <b>Endometrial</b>  |                           |      |               |      |      |
| <b>Overall</b>      | Inverse-variance weighted | 1.38 | (1.04-1.82)   | 0.03 | 0.08 |
|                     | Wald (rs2227631)          | 1.12 | (0.74-1.70)   | 0.59 | NA   |
|                     | MR-Egger                  | 1.65 | (0.01-406.40) | 0.73 | 0.90 |
|                     | Weighted median           | 1.18 | (0.83-1.68)   | 0.35 | NA   |

OR: odds ratio; CI: confidence intervals; P-value for pleiotropy in MR-Egger regression; P-value for heterogeneity in inverse-variance weighted analysis.

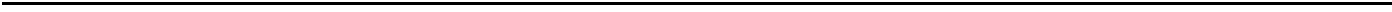

**Supplementary Table 7. Associations with potential confounders of the selected variants for adipokines.**

| SNP       | Associated with potential confounders                                                                                                                                                                                                                                                                                                                                                                                                                                                | Associated with obesity-related confounders | Adipokine   |
|-----------|--------------------------------------------------------------------------------------------------------------------------------------------------------------------------------------------------------------------------------------------------------------------------------------------------------------------------------------------------------------------------------------------------------------------------------------------------------------------------------------|---------------------------------------------|-------------|
| rs2791552 | Adiposity, Arm fat mass left, Arm fat mass right, Arm fat percentage left, Arm fat percentage right, Body fat percentage, Fasting insulin, Hip circumference, Impedance of arm left, Impedance of arm right, Impedance of whole body, Leg fat mass left, Leg fat mass right, Leg fat percentage left, Leg fat percentage right, log Fasting insulin, Trunk fat mass, Trunk fat percentage, Waist circumference adjusted for smoking in females, Waist hip ratio, Whole body fat mass | Yes                                         | adiponectin |
| rs2943641 | Adiposity, Appendicular lean mass, Arm fat percentage left, Arm fat percentage right, Arm fat-free mass left, Arm fat-free mass right, Arm predicted mass left, Arm predicted mass right, Body fat percentage, Body mass index, Diabetes diagnosed by doctor, Fasting insulin, HDL cholesterol, Hypertension, Illnesses of mother: diabetes, Impedance of arm left, Impedance of arm right,                                                                                          | Yes                                         | adiponectin |

rs2276853

Impedance of whole body, Insulin sensitivity index adjusted for BMI, IRS1 gene expression in human omental fat, IRS1 gene expression in Omental fat tissue from patients who underwent bariatric surgery, IRS1 gene expression in Subcutaneous fat tissue from the general population, IRS1 gene expression in Subcutaneous fat tissue from the general population male, IRS1 Transcript NM005544 expression in Adipose tissue, Lean body mass, log Fasting insulin, Medication for cholesterol, blood pressure or diabetes: blood pressure medication, Percent body fat, Self-reported diabetes, Self-reported high cholesterol, Treatment with metformin, Triglycerides, Trunk fat mass, Trunk fat percentage, Trunk fat-free mass, Trunk predicted mass, Type 2 diabetes, Waist circumference in physically active males, Waist circumference in males, Waist circumference in physically active females, Waist hip ratio in males Granulocyte count, Lymphocyte count, Myeloid white cell count, Platelet distribution width, Sum neutrophil eosinophil counts, White blood cell count

No

adiponectin

|            |                                                                                                                                                                                                                                                                                                                                                                                                                                                                                                                                                                  |     |             |
|------------|------------------------------------------------------------------------------------------------------------------------------------------------------------------------------------------------------------------------------------------------------------------------------------------------------------------------------------------------------------------------------------------------------------------------------------------------------------------------------------------------------------------------------------------------------------------|-----|-------------|
| rs3087866  | Height, High light scatter percentage of red cells, High light scatter reticulocyte count, Impedance of arm left, Impedance of arm right, Impedance of whole body, Mean corpuscular hemoglobin, Mean corpuscular volume, Pulse rate, Reticulocyte count, Reticulocyte fraction of red cells, Sitting height                                                                                                                                                                                                                                                      | No  | adiponectin |
| rs13303    | Age at menarche, Cross disorder, Hematocrit, Hemoglobin concentration, High light scatter percentage of red cells, High light scatter reticulocyte count, Impedance of arm left, Impedance of arm right, Impedance of leg left, Impedance of leg right, Impedance of whole body, Intelligence multi trait analysis, NT5DC2 gene expression in human adipocytes, Red blood cell count, Reticulocyte count, Reticulocyte fraction of red cells, Schizophrenia, Waist circumference adjusted for BMI, Waist hip ratio adjusted for BMI, Worrier or anxious feelings | Yes | adiponectin |
| rs17366568 | -                                                                                                                                                                                                                                                                                                                                                                                                                                                                                                                                                                | -   | adiponectin |
| rs13133548 | Arm fat percentage left, Arm fat percentage right, Body fat percentage, Body mass index, Fasting insulin, HDL cholesterol, High density lipoprotein,                                                                                                                                                                                                                                                                                                                                                                                                             | Yes | adiponectin |

|            |                                                                                                                                                                                                                                                                                                                                                                                                                                                                                                                                                                                                                                         |     |             |
|------------|-----------------------------------------------------------------------------------------------------------------------------------------------------------------------------------------------------------------------------------------------------------------------------------------------------------------------------------------------------------------------------------------------------------------------------------------------------------------------------------------------------------------------------------------------------------------------------------------------------------------------------------------|-----|-------------|
| rs2925979  | Hip circumference, Impedance of arm left, Impedance of arm right, log Fasting insulin adjusted for BMI, Trunk fat mass, Trunk fat percentage, Waist circumference adjusted for smoking in females, Waist to hip ratio adjusted for body mass index, Whole body fat mass Cholesterol hdl, HDL cholesterol, High density lipoprotein, Impedance of arm left, Impedance of arm right, Self-reported hypertension, Treatment with cholesterol lowering medication, Type 2 diabetes, Vascular or heart problems diagnosed by doctor: high blood pressure, Vascular or heart problems diagnosed by doctor: none of the above, Waist hip ratio | Yes | adiponectin |
| rs10282707 | Arm fat-free mass left, Arm fat-free mass right, Arm predicted mass left, Arm predicted mass right, HDL cholesterol, High density lipoprotein, Trunk fat-free mass, Trunk predicted mass, Whole body fat-free mass, Whole body water mass                                                                                                                                                                                                                                                                                                                                                                                               | Yes | adiponectin |
| rs3735080  | Lymphocyte count, Lymphocyte percentage of white cells, Neutrophil percentage of white cells, Impedance of leg left                                                                                                                                                                                                                                                                                                                                                                                                                                                                                                                     | No  | adiponectin |
| rs7134375  | Cholesterol hdl, Pulse rate                                                                                                                                                                                                                                                                                                                                                                                                                                                                                                                                                                                                             | No  | adiponectin |
| rs10861661 | Comparative height size at age 10,                                                                                                                                                                                                                                                                                                                                                                                                                                                                                                                                                                                                      | No  | adiponectin |

|             |                                                                                                                                                                                                                                                                                                                                                                                                                                                                                                                                                                                                                                                                                                 |     |             |
|-------------|-------------------------------------------------------------------------------------------------------------------------------------------------------------------------------------------------------------------------------------------------------------------------------------------------------------------------------------------------------------------------------------------------------------------------------------------------------------------------------------------------------------------------------------------------------------------------------------------------------------------------------------------------------------------------------------------------|-----|-------------|
|             | Height, Sitting height                                                                                                                                                                                                                                                                                                                                                                                                                                                                                                                                                                                                                                                                          |     |             |
|             | Body mass index, Hip circumference, High density lipoprotein, Arm fat mass left, Arm fat mass right, Arm fat percentage left, Arm fat percentage right, Arm fat-free mass left, Arm fat-free mass right, Arm predicted mass left, Arm predicted mass right, Basal metabolic rate, Body fat percentage, Height, Leg fat mass left, Leg fat mass right, Leg fat percentage left, Leg fat percentage right, Leg fat-free mass left, Leg fat-free mass right, Leg predicted mass left, Leg predicted mass right, Trunk fat mass, Trunk fat percentage, Trunk fat-free mass, Trunk predicted mass, Waist circumference, Weight, Whole body fat mass, Whole body fat-free mass, Whole body water mass | Yes |             |
| rs11057405  |                                                                                                                                                                                                                                                                                                                                                                                                                                                                                                                                                                                                                                                                                                 |     | adiponectin |
| rs11057353  | -                                                                                                                                                                                                                                                                                                                                                                                                                                                                                                                                                                                                                                                                                               | -   | adiponectin |
|             | Cholesterol hdl, HDL cholesterol, High density lipoprotein, Fasting insulin adjusted for BMI, Reticulocyte count, Reticulocyte fraction of red cells                                                                                                                                                                                                                                                                                                                                                                                                                                                                                                                                            | Yes |             |
| rs4311394   |                                                                                                                                                                                                                                                                                                                                                                                                                                                                                                                                                                                                                                                                                                 |     | adiponectin |
| rs3865188   | -                                                                                                                                                                                                                                                                                                                                                                                                                                                                                                                                                                                                                                                                                               | -   | adiponectin |
| rs145119400 | -                                                                                                                                                                                                                                                                                                                                                                                                                                                                                                                                                                                                                                                                                               | -   | adiponectin |
|             | Arm fat percentage left, Arm fat percentage right, Body fat percentage, High density lipoprotein, Impedance of                                                                                                                                                                                                                                                                                                                                                                                                                                                                                                                                                                                  | Yes |             |
| rs4805885   |                                                                                                                                                                                                                                                                                                                                                                                                                                                                                                                                                                                                                                                                                                 |     | adiponectin |

|            |                                                                                                                                                                                                                                                                                                                                                                    |     |                 |
|------------|--------------------------------------------------------------------------------------------------------------------------------------------------------------------------------------------------------------------------------------------------------------------------------------------------------------------------------------------------------------------|-----|-----------------|
|            | arm left, Impedance of arm right, Impedance of whole body, log Fasting insulin adjusted for BMI, PEPD gene expression in human adipocytes, Trunk fat mass, Trunk fat percentage, Whole body fat mass                                                                                                                                                               |     |                 |
| rs10487505 | Comparative body size at age 10                                                                                                                                                                                                                                                                                                                                    | Yes | leptin          |
| rs6071166  | -                                                                                                                                                                                                                                                                                                                                                                  | -   | leptin          |
| rs17415296 | Blood protein levels, White blood cell count                                                                                                                                                                                                                                                                                                                       | No  | leptin receptor |
|            | Baseline acute phase serum amyloid concentrations, Blood protein levels, C reactive protein, Granulocyte count, Granulocyte percentage of myeloid white cells, Mean corpuscular hemoglobin, Myeloid white cell count, Neutrophil count, Plasma C reactive protein female, Sum basophil neutrophil counts, Sum neutrophil eosinophil counts, White blood cell count | No  |                 |
| rs4655537  | Granulocyte count, Granulocyte percentage of myeloid white cells, Myeloid white cell count, Neutrophil count, Sum basophil neutrophil counts, Sum neutrophil eosinophil counts,                                                                                                                                                                                    | Yes | leptin receptor |
| rs17412403 | Blood protein levels, Age at menarche, Comparative body size at age 10, Impedance of arm, Impedance of whole body, White blood cell count                                                                                                                                                                                                                          |     | leptin receptor |



|            |                                                                                                                                                                                                                                                                                                                                                                     |     |                                   |
|------------|---------------------------------------------------------------------------------------------------------------------------------------------------------------------------------------------------------------------------------------------------------------------------------------------------------------------------------------------------------------------|-----|-----------------------------------|
| rs7535099  | Blood protein levels<br>Type 2 diabetes, Arm fat mass, Arm fat percentage, Body fat percentage, Impedance of arm, Impedance of leg, Impedance of whole body, Leg fat mass, Leg fat percentage, Trunk fat mass, Trunk fat percentage, Whole body fat mass, Waist circumference, Fasting insulin, Body mass index, Proximal gene expression in macrophages PPARG gene | No  | leptin receptor                   |
| rs11128603 |                                                                                                                                                                                                                                                                                                                                                                     | Yes |                                   |
| rs2227631  | -                                                                                                                                                                                                                                                                                                                                                                   | -   | plasminogen activator inhibitor-1 |
| rs6976053  | Heart rate, Proximal gene expression in monocytes II TRIP6 gene, Proximal gene expression in monocytes II UFSP1 gene, Proximal gene expression in monocytes TRIP6 gene, Proximal gene expression in monocytes UFSP1 gene, Proximal gene expression in the liver MUC3A gene, Pulse rate, RR interval                                                                 | No  | plasminogen activator inhibitor-1 |
| rs6486122  | Age at menarche, Body mass index                                                                                                                                                                                                                                                                                                                                    | Yes | plasminogen activator inhibitor-1 |

---
